# Supplementary material for: Risk of relapse after antidepressant discontinuation in anxiety disorders, obsessive-compulsive disorder, and post-traumatic stress disorder: systematic review and meta-analysis of relapse prevention trials
Source: PubMed Central journal article supplement — BMJ. 2017 Sep 13;358:j3927. doi: 10.1136/bmj.j3927 (PMC5596392; doi:10.1136/bmj.j3927), 2017-09-13

## Appendix 1. Search strategy Pubmed.

Search (((("Anxiety Disorders"[Mesh] OR anxiety disorder\* [tiab] OR generalized anxiety disorder\* [tiab] OR generalised anxiety disorder\* [tiab] OR agoraphobi\* [tiab] OR panic\* [tiab] OR phobi\* [tiab] OR obsessive-compulsive [tiab] OR post-traumatic\* [tiab] OR posttraumatic\* [tiab] OR traumatic\* [tiab] OR anxiety disorder\* [OT] OR generalized anxiety disorder\* [OT] OR generalised anxiety disorder\* [OT] OR agoraphobi\* [OT] OR phobi\* [OT] OR obsessive-compulsive [OT] OR post-traumatic\* [OT] OR posttraumatic\* [OT] OR traumatic\* [OT])) AND ("Antidepressive Agents" [Pharmacological Action] OR "Antidepressive Agents"[Mesh] OR "Serotonin Uptake Inhibitors"[Mesh] OR antidepressiv\* [tiab] OR antidepressant\* [tiab] OR SSRI\* [tiab] OR SNRI\* [tiab] OR TCA\* [tiab] OR serotonin reuptake inhibitor\* [tiab] OR antidepressiv\* [OT] OR antidepressant\* [OT] OR serotonin reuptake inhibitor\* [OT] OR SSRI\* [OT] OR SNRI\* [OT] OR TCA\* [OT])) AND ("Secondary Prevention"[Mesh] OR "Recurrence"[Mesh] OR continuation\* [tiab] OR continuing [tiab] OR discontinuation\* [tiab] OR discontinuing [tiab] OR relaps\* [tiab] OR remission [tiab] OR recurren\* [tiab] OR maintenance [tiab] OR withdrawal [tiab] OR continuation\* [OT] OR continuing [OT] OR relaps\* [OT] OR remission [OT] OR recurren\* [OT] OR maintenance [OT] OR withdrawal [OT])) AND (randomized controlled trial[pt] OR controlled clinical trial[pt] OR randomized[tiab] OR placebo\* [tiab] OR randomly[tiab] OR RCT[tiab] OR controlled trial\* [tiab] OR clinical trial\* [tiab] OR randomized[OT] OR placebo\* [OT] OR randomly[OT] OR RCT [OT] OR controlled trial\* [OT] OR clinical trial\* [OT])

This search strategy has been translated for additional searches in both Embase and Cochrane.

Appendix 2: Quality assessment per study according to Cochrane Tool for assessing risk of bias.<sup>32</sup>

| Reference | Selection bias             |                        | Performance bias     |                       | Detection bias                 | Attrition bias          | Reporting bias      | # scoring high |
|-----------|----------------------------|------------------------|----------------------|-----------------------|--------------------------------|-------------------------|---------------------|----------------|
|           | Random sequence generation | Allocation concealment | Blinding of patients | Blinding of providers | Blinding of outcome assessment | Incomplete outcome data | Selective reporting |                |
| 55        | Low                        | Low                    | Low                  | Low                   | Low                            | High                    | Low                 | 1              |
| 56        | Low                        | Low                    | High                 | Low                   | Low                            | High                    | Low                 | 2              |
| 68        | Unclear                    | Unclear                | High                 | Low                   | Low                            | Low                     | Low                 | 1              |
| 41        | Low                        | Unclear                | Low                  | Low                   | Low                            | Low                     | Unclear             | 0              |
| 48        | Low                        | Low                    | Low                  | Low                   | Low                            | High                    | Unclear             | 1              |
| 65        | Unclear                    | Unclear                | Low                  | Low                   | Low                            | High                    | Unclear             | 1              |
| 58        | Low                        | Low                    | Low                  | Low                   | Low                            | Low                     | High                | 1              |
| 59        | Unclear                    | Unclear                | High                 | Low                   | Low                            | High                    | Low                 | 2              |
| 50        | Unclear                    | Unclear                | High                 | Low                   | Low                            | High                    | High                | 3              |
| 51        | Unclear                    | Unclear                | High                 | Low                   | Low                            | High                    | High                | 3              |
| 52        | Unclear                    | Unclear                | Low                  | Low                   | Low                            | High                    | High                | 2              |
| 53        | Unclear                    | Unclear                | Low                  | Low                   | Low                            | High                    | High                | 2              |
| 60        | Low                        | Low                    | High                 | Low                   | Low                            | High                    | Unclear             | 2              |
| 67        | Unclear                    | Unclear                | High                 | Low                   | Low                            | Low                     | Unclear             | 1              |
| 61        | Unclear                    | Low                    | Low                  | Low                   | Low                            | High                    | Low                 | 1              |
| 62        | Unclear                    | Low                    | Low                  | Low                   | Low                            | High                    | High                | 2              |
| 69        | Unclear                    | Unclear                | Low                  | Low                   | Low                            | Low                     | High                | 1              |
| 64        | Low                        | Low                    | Low                  | Low                   | Low                            | High                    | Low                 | 1              |
| 42        | Unclear                    | Unclear                | Low                  | Low                   | Low                            | High                    | High                | 2              |
| 70        | Low                        | Low                    | High                 | Low                   | Low                            | Low                     | Low                 | 1              |
| 66        | Unclear                    | Unclear                | High                 | Low                   | Low                            | High                    | Low                 | 2              |
| 24        | Unclear                    | Unclear                | Low                  | Low                   | Low                            | High                    | High                | 2              |
| 63        | Unclear                    | Unclear                | Low                  | Low                   | Low                            | High                    | Low                 | 1              |

---

|    |         |         |      |     |     |         |      |   |
|----|---------|---------|------|-----|-----|---------|------|---|
| 71 | Unclear | Low     | Low  | Low | Low | High    | High | 2 |
| 72 | Low     | Low     | Low  | Low | Low | High    | Low  | 1 |
| 57 | Low     | Low     | Low  | Low | Low | Unclear | Low  | 0 |
| 54 | Low     | Unclear | Low  | Low | Low | Low     | High | 1 |
| 73 | Unclear | Unclear | High | Low | Low | Low     | Low  | 1 |

Appendix 3: Characteristics of included studies.

| Reference | Anxiety Disorder | Age <sup>a</sup>                                           |             | Antidepressant | Dose (mg/day) | Discontinuation <sup>b</sup> | Duration treatment before randomisation (in weeks) | Duration follow-up (in weeks) | N treatment | N follow-up    |         | N relapse during follow-up |         | Concurrent psychotherapy allowed | Comorbidity mostly excluded | Role pharmaceutical companies       |
|-----------|------------------|------------------------------------------------------------|-------------|----------------|---------------|------------------------------|----------------------------------------------------|-------------------------------|-------------|----------------|---------|----------------------------|---------|----------------------------------|-----------------------------|-------------------------------------|
|           |                  | Antidepressant                                             | Placebo     |                |               |                              |                                                    |                               |             | Antidepressant | Placebo | Antidepressant             | Placebo |                                  |                             |                                     |
| 55        | GAD              | 41 (18-65)*                                                | 42 (18-64)* | Escitalopram   | 20            | Taper                        | 12                                                 | 24 <sup>c</sup>               | 491         | 187            | 188     | 34                         | 98      | Yes                              | Yes                         | Yes, funded/support ed/sponsored by |
| 56        | GAD              | 43.3 (13.3)                                                |             | Vortioxetine   | 5-10          | Abrupt                       | 20                                                 | 24 <sup>d</sup>               | 687         | 224            | 227     | 26                         | 66      | No                               | Yes                         | Yes, author(s) salary paid by       |
| 68        | PTSD             | 44.9 (9.8)                                                 | 42.0 (10.8) | Sertraline     | 50-200        | Abrupt                       | 24                                                 | 28                            | 380         | 38             | 46      | 6                          | 21      | No                               | No                          | Yes, funded/support ed/sponsored by |
| 41        | PTSD             | 44.0 (12.0)                                                | 44.1 (11.7) | Fluoxetine     | 20-60         | Taper                        | 24                                                 | 26                            | 123         | 30             | 32      | 6                          | 15      | Yes                              | No                          | Yes, medication provided by         |
| 48        | GAD              | 45.0 (13.2)                                                | 45.7 (14.1) | Duloxetine     | 60-120        | Taper                        | 26                                                 | 26                            | 887         | 216            | 213     | 28                         | 84      | Yes                              | Yes                         | Yes, funded/support ed/sponsored by |
| 65        | PD               | 37.3 (10.9)                                                | 39.5 (10.7) | Venlafaxine    | 75-225        | Taper                        | 12                                                 | 26                            | 313         | 89             | 80      | 20                         | 40      | No                               | Yes                         | Yes, funded/support ed/sponsored by |
| 58        | OCD              | 35.4 (12.4)                                                | 35.8 (11.1) | Escitalopram   | 10 or 20      | Taper                        | 16                                                 | 24                            | 468         | 163            | 157     | 38                         | 81      | No                               | Yes                         | Yes, author(s) salary paid by       |
| 59        | OCD              | 11.8 (2.56)                                                | 11.6 (2.88) | Paroxetine     | 10-60         | Abrupt                       | 16                                                 | 16                            | 335         | 95             | 98      | 33                         | 43      | No                               | No                          | Yes, funded/support ed/sponsored by |
| 50        | OCD              | 40.7 (10.5)                                                | 41.1 (12.5) | Paroxetine     | 20-60         | Abrupt                       | 26                                                 | 26                            | 154         | 20             | 24      | 8                          | 14      | No                               | Yes                         | Yes, funded/support ed/sponsored by |
| 51        | PD               | Par10: 37.8 (12.9); Par20: 34.4 (11.0); Par40: 35.3 (10.5) | 39.2 (10.1) | Paroxetine     | 10; 20; or 40 | Abrupt                       | 22                                                 | 12                            | 278         | 43             | 43      | 2                          | 11      | Yes                              | Yes                         | Yes, funded/support ed/sponsored by |
| 52        | SP               | 37.2 (11.9)                                                | 32.5 (10.5) | Paroxetine     | 20-50         | Taper                        | 24                                                 | 16                            | 98          | 27             | 28      | 8                          | 5       | Yes                              | Yes                         | Yes, funded/support                 |

|    |      |              |              |              |          |        |    |    |     |     |     |    |    |     |     |                                                                    |
|----|------|--------------|--------------|--------------|----------|--------|----|----|-----|-----|-----|----|----|-----|-----|--------------------------------------------------------------------|
| 53 | PTSD | 42.7 (13.9)  | 42.8 (12.0)  | Paroxetine   | 20-50    | Taper  | 12 | 16 | 265 | 87  | 86  | 17 | 19 | No  | Yes | ed/sponsored by Yes, funded/support ed/sponsored by                |
| 60 | OCD  | 45.1 (11.7)  | 40.1 (13.0)  | Paroxetine   | 20-60    | Abrupt | 26 | 26 | 263 | 53  | 51  | 20 | 30 | No  | No  | funded/support ed/sponsored by Yes, funded/support ed/sponsored by |
| 67 | PD   | 35.3 (8.1)   | 36.1 (9.5)   | Sertraline   | 25-100   | Abrupt | 8  | 8  | 394 | 119 | 121 | 12 | 16 | Yes | Yes | funded/support ed/sponsored by Yes, funded/support ed/sponsored by |
| 61 | OCD  | 39.2 (11.5)  | 39.5 (10.8)  | Sertraline   | 50-200   | Taper  | 52 | 28 | 649 | 109 | 114 | 10 | 27 | No  | Yes | funded/support ed/sponsored by Yes, funded/support ed/sponsored by |
| 62 | OCD  | 34.5 (10.24) |              | Mirtazapine  | 30-60    | Taper  | 12 | 8  | 30  | 7   | 8   | 2  | 5  | No  | Yes | funded/support ed/sponsored by Yes, funded/support ed/sponsored by |
| 69 | PTSD | 37.1 (9.4)   | 39.4 (9.4)   | Fluoxetine   | 20-80    | Taper  | 12 | 24 | 226 | 69  | 62  | 4  | 10 | No  | Yes | funded/support ed/sponsored by                                     |
| 64 | PD   | 34.28 (8.23) | 37.89 (9.92) | Imipramine   | 10-75    | Taper  | 24 | 52 | 110 | 29  | 27  | 1  | 10 | Yes | No  | No                                                                 |
| 42 | PD   | 38.7 (9.5)   | 36.4 (11.1)  | Fluoxetine   | 10 or 20 | Taper  | 10 | 24 | 165 | 38  | 50  | 1  | 4  | Yes | No  | Yes, funded/support ed/sponsored by                                |
| 70 | SP   | 36 (18-78)*  | 38 (19-68)*  | Escitalopram | 10 or 20 | Abrupt | 12 | 24 | 517 | 190 | 181 | 42 | 91 | No  | Yes | funded/support ed/sponsored by Yes, funded/support ed/sponsored by |
| 66 | PD   | 41.0 (10.8)  | 40.3 (11.4)  | Sertraline   | 50-200   | Abrupt | 52 | 28 | 398 | 92  | 89  | 11 | 21 | Yes | No  | funded/support ed/sponsored by Yes, medication provided by         |
| 24 | GAD  | 49.8 (15.8)  |              | Venlafaxine  | 75-225   | Taper  | 26 | 26 | 268 | 82  | 54  | 8  | 29 | Yes | Yes | Yes, medication provided by                                        |
| 63 | OCD  | 39.5 (11.3)  | 42.2 (14.7)  | Fluoxetine   | 20-60    | Taper  | 20 | 52 | 130 | 36  | 34  | 7  | 11 | No  | No  | funded/support ed/sponsored by                                     |
| 71 | SP   | Not reported |              | Paroxetine   | 20-50    | Taper  | 11 | 12 | 36  | 8   | 8   | 1  | 5  | Yes | No  | No                                                                 |

|    |     |                |                |             |        |        |    |    |         |     |     |    |     |     |     |                                    |
|----|-----|----------------|----------------|-------------|--------|--------|----|----|---------|-----|-----|----|-----|-----|-----|------------------------------------|
| 72 | SP  | 38.1 (11.7)    | 38.2 (11.2)    | Paroxetine  | 20-50  | Taper  | 12 | 24 | 437     | 162 | 161 | 22 | 61  | Yes | Yes | Yes, funded/supported/sponsored by |
| 57 | GAD | 45.9 (14.0)    | 47.0 (15.1)    | Agomelatine | 25-50  | Abrupt | 16 | 26 | 477     | 113 | 114 | 22 | 35  | No  | Yes | Yes, funded/supported/sponsored by |
| 54 | GAD | 43.0 (12.7)    | 43.7 (13.1)    | Paroxetine  | 20-50  | Taper  | 8  | 24 | 652     | 274 | 287 | 30 | 115 | Yes | Yes | Yes, funded/supported/sponsored by |
| 73 | SP  | 37.24 (24-57)* | 35.06 (21-46)* | Sertraline  | 50-200 | Abrupt | 20 | 24 | Unclear | 25  | 25  | 1  | 9   | No  | No  | Yes, funded/supported/sponsored by |

<sup>a</sup> Studies with an "\*" report mean age and age range, all other studies report mean age and standard deviation.

<sup>b</sup> Fluoxetine was discontinued abruptly in all studies, however given the relatively long half-life time of fluoxetine, this medication is considered to taper itself.

<sup>c</sup> <sup>55</sup> had a minimum follow-up duration of 24 weeks, and depending on when a participant was included, a maximum follow-up of 76 weeks.

<sup>d</sup> <sup>56</sup> had a minimum follow-up duration of 24 weeks, and depending on when a participant was included, a maximum follow-up of 56 weeks.

**Appendix 4. Funnel plot proportion of relapse**

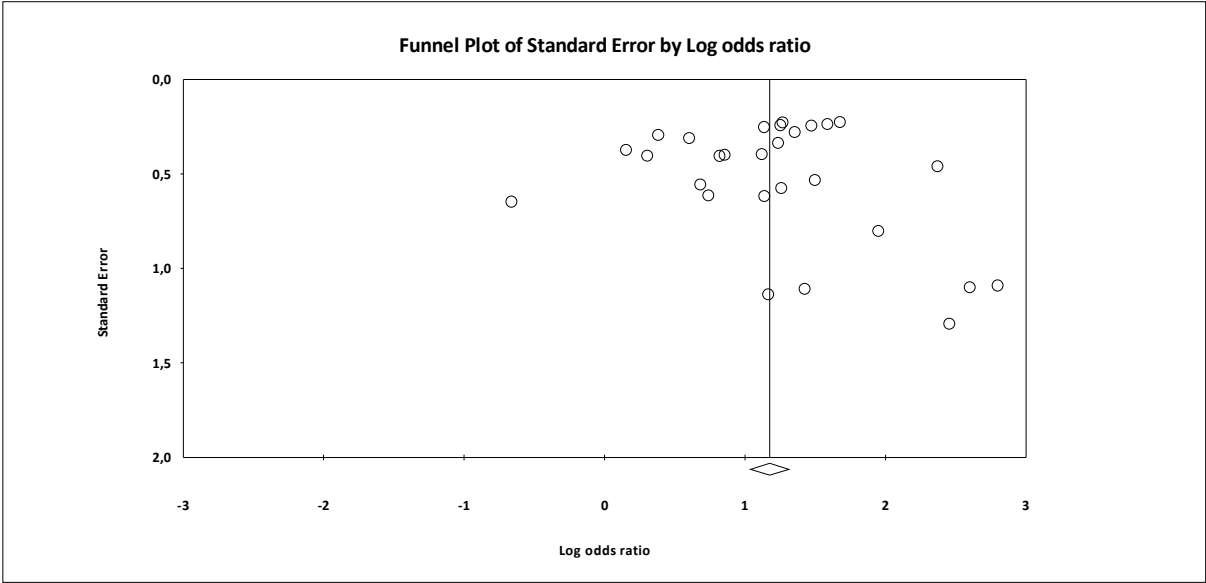

**Appendix 5. Funnel plot time to relapse**

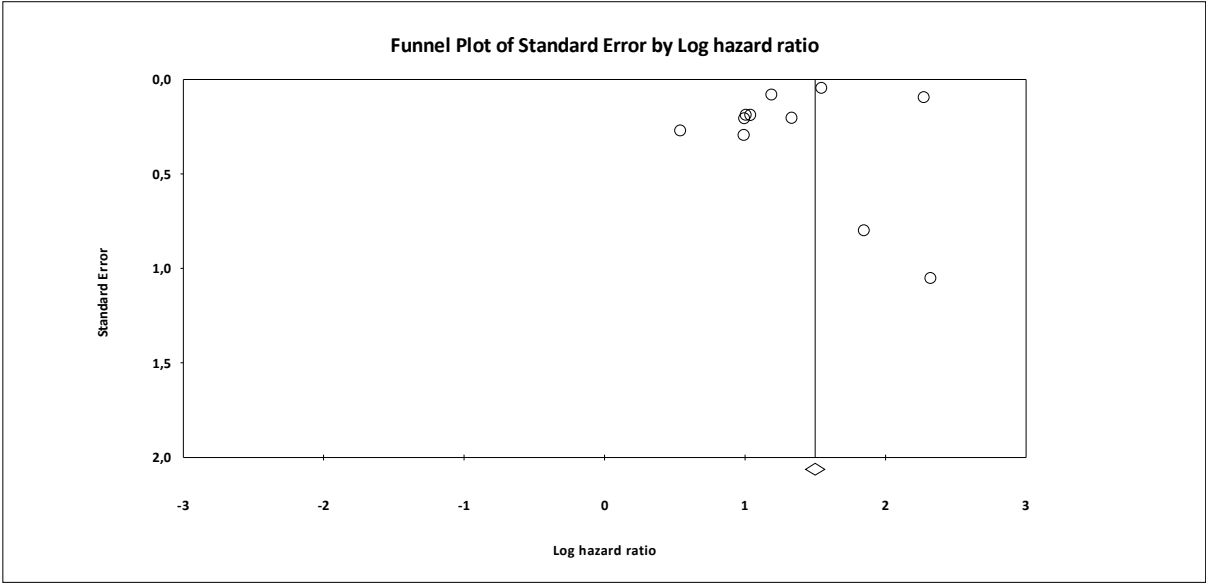

Supplement: batn033460.ww1.pdf [file batn033460.ww1.pdf]
